# Supplementary material
Source: PubMed Central journal article supplement (PMC193598)
Supplement: pnas_1837812100_3.pdf [file pnas_1837812100_3.pdf]

1 ACAAGTCTGCTGAGGCCAATCGTGGGTGATGATCCTCAGTCCTCTCTCTGGCCGAGGTGT  
61 GGCCAGACCCCTAGAGAGGCGCCTCTGAGGGAAGCAGAAGCCAGAACACAGCCACT  
121 CACTACCGAGAGGAACCAGGTGGACTTTGCCAGCTGCCATCCTGGAGTATCTAGCACCTG  
181 GAGTTTCTACAGCAGTCTTGGGAAGAGAATCAGAGAGCTGTGCCGCTGGTGTACCATA  
241 GCAGCCTCAAATGGCTCAAATGGTGGCTGGAGACCAAGATGCCGGCACACTGTGGGTCCC  
M A Q M V A G D Q D A G T L W V P 17  
301 AAGCCAGAGTGAGAGTCAAAGTCCGACATCAGTACCCAAAGCCTGCGGAAGCCAC  
S Q S E S Q T E S D I S T Q S L R K P T\* 37  
361 CATGTCGTATGTGATTCTGAAGACTTTGGCTGACAAGCGGGTACATAATTGTGTGCCCT  
M S Y V I L K T L A D K R V H N C V S L 57  
421 TGCTACCTTGAAGAAAGCTGTGTCTATCACAGGGTACAATATGACCCATAACACCTGGCG  
A T L K K A V S I T G Y N M T H N T W R 77  
481 CTTCAAGCGTGTGCTCCAGAATCTACTCGATAAAGGCATGATCATGCATGTGACCTGCTG  
F K R V L Q N L L D K G M I M H V T C C 97  
541 CAAGGGTGCCTCCGGCTCCCTCTGCCTGTGCAAGGAGCGGGCCCTCAAGTCCAACCACAG  
K G A S G S L C L C K E R A L **K S** N H R 117  
601 GGCCAAGAGATGCCAGGACAGACAGAAGAGCCAGAAGCCTCAGAAGCCTGGGCAGCGTGA  
A **K** R C Q D R Q **K S**\* Q K P Q K P G Q R E 137  
661 GTCTGAACCATGCCAATTGCTACTAAGCTCCAAAAAGAAGAATGACCAGCTTTTCAAAGG  
**S** E P C Q L L L **S S K K K** N D Q L F **K** G 157  
721 AGTCCGTAGGGTGGCCAAAGGCAACCGCCATTGCCATTATTAAGGCAGGTGAGCGGGGT  
V R R V A **K** G N R H C H Y # 170  
781 GCCAGGCTTGCCACCAAGTGGGAATAAAACGCAACTTATTTTCAAA
