# Supplementary material
Source: PubMed Central journal article supplement (PMC193598)
Supplement: pnas_1837812100_5.pdf [file pnas_1837812100_5.pdf]

1 atccgcccaggcatgtgcacacacacatgcatatgtgcacgcaccgtgcaggcccgtgt  
60 ctggcccacaagcgcagccctcctccccaggacacctggcatgttacatgcctccacat  
M L H A S T I 7  
121 ctggcatctccgggtccaccctccccggaggaaacaatggggccactgtgaccacacag  
W H L R S T P P R R K Q W G H C D P H R 27  
181 aattctggtagcctctgaggtcaccacagagataacctaccaaccctgcaccaagagc  
I L V A S E V T T E I T S P T P A P R A 47  
241 acaagtctgtggaggccagccgtgggtgaccgtccttgatcctctttctggccacacagg  
Q V C G G Q P W V T V L D P L S G H T G 67  
301 gagagaagcagaaaggcacttcgccactgtctccatcagtgtgttgaactcaaatactg  
R E A E R H F A T V S I S A V E L K Y C 87  
361 ccatgggtggaggccagcagggcagcgtgtccttagcaagacagcgactgggcaacgcac  
H G W R P A G Q R V P S K T A T G Q R T 107  
421 ctgtgccaaaccctgccagaagcccagcacgtccaaggtgatcctgagggctgtggcgga  
C A K P C Q K P S T<sup>\*</sup> S K V I L R A V A D 127  
481 caaggggacctgcaagtatgtgtccctggccaccctgaagaaggctgtttccaccacggg  
K G T C K Y V S L A T L K K A V S T T G 147  
541 ctacgacatggcccgaatgcctatcacttcaagcgtgtgctcaaggggctggggacaa  
Y D M A R N A Y H F K R V L K G L V D K 167  
601 gggctcagcaggctccttcaccctgggcaagaagcaggcctccaagtccaagctcaaggt  
G S A G S F T L G K K Q A S<sup>\*</sup> K S K L K V 187  
661 caagaggcaacgacagcagaggtggcgctctgggcagcgccttggacagcacaggtc  
K R Q R Q Q R W R S G Q R P F G Q H R S 207  
721 actactgggctccaaacaggggcacaagcggcttatcaaggggggttcgaaggggtggccaa  
L L G S K Q G H K R L I K G V R R V A K 227  
781 gtgccactgcaattaatgaggcaggccaggcaagcagtcaggggtgccaagaccgccatt  
C H C N # 231  
841 ggctcagtgcagtgggaataaaaaaaaaaaaaaaaaaaaaa
