# Supplementary material
Source: PubMed Central journal article supplement (PMC193598)

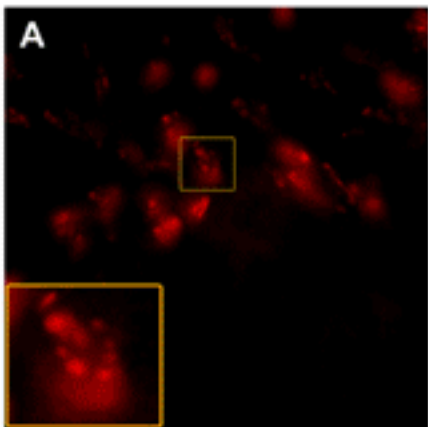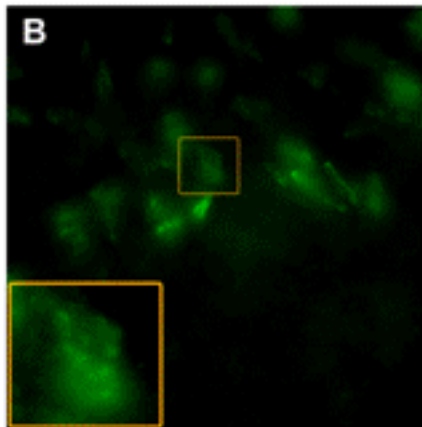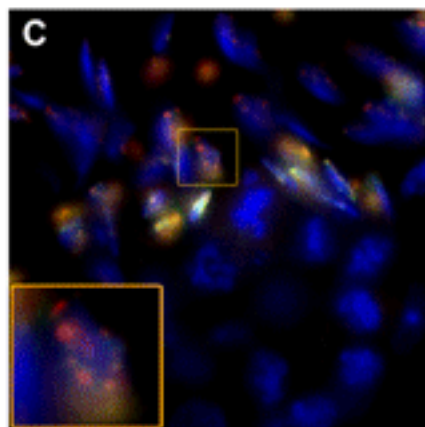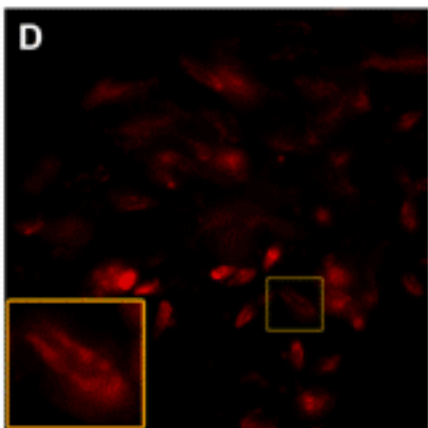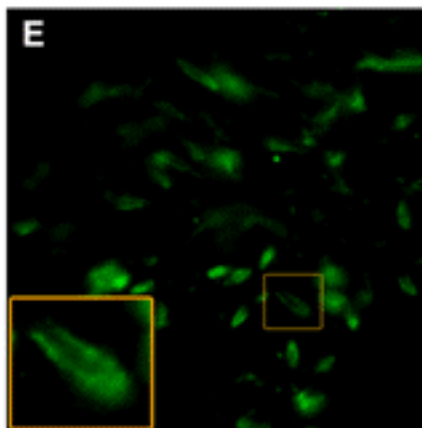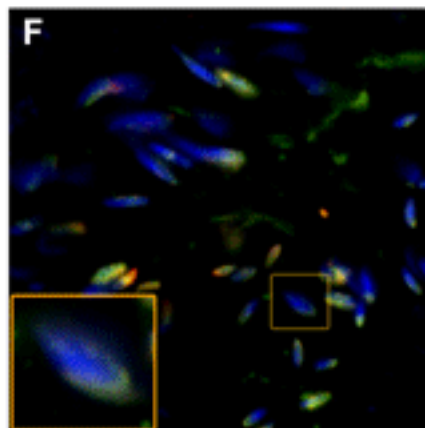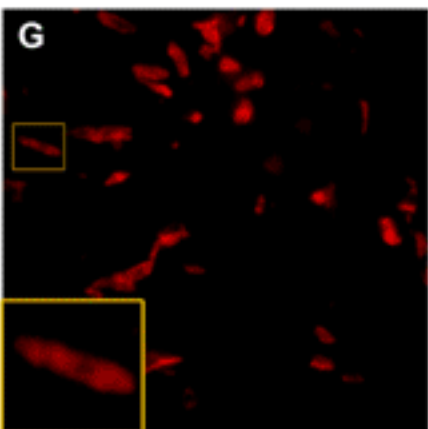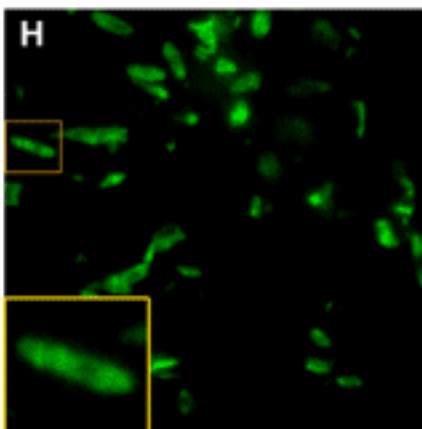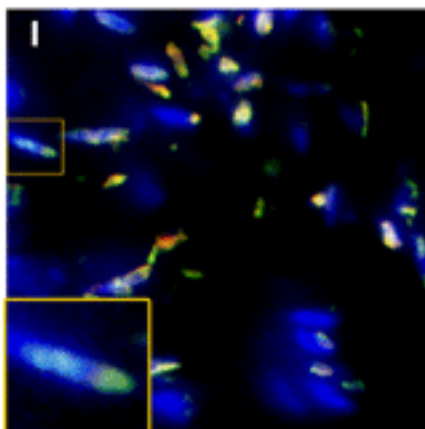

Supplement: pnas_1837812100_11.pdf [file pnas_1837812100_11.pdf]

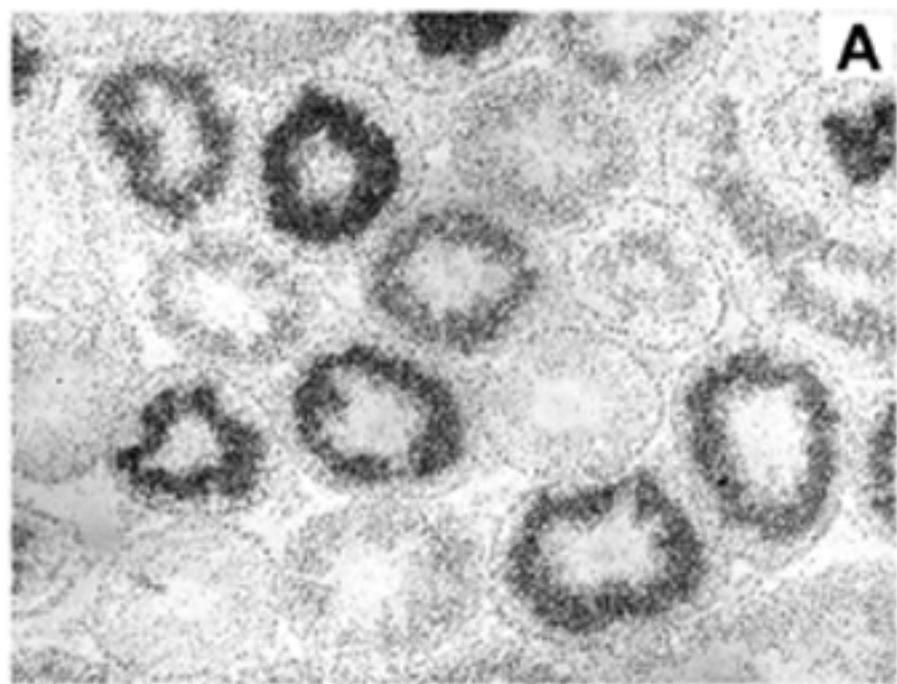

**A**

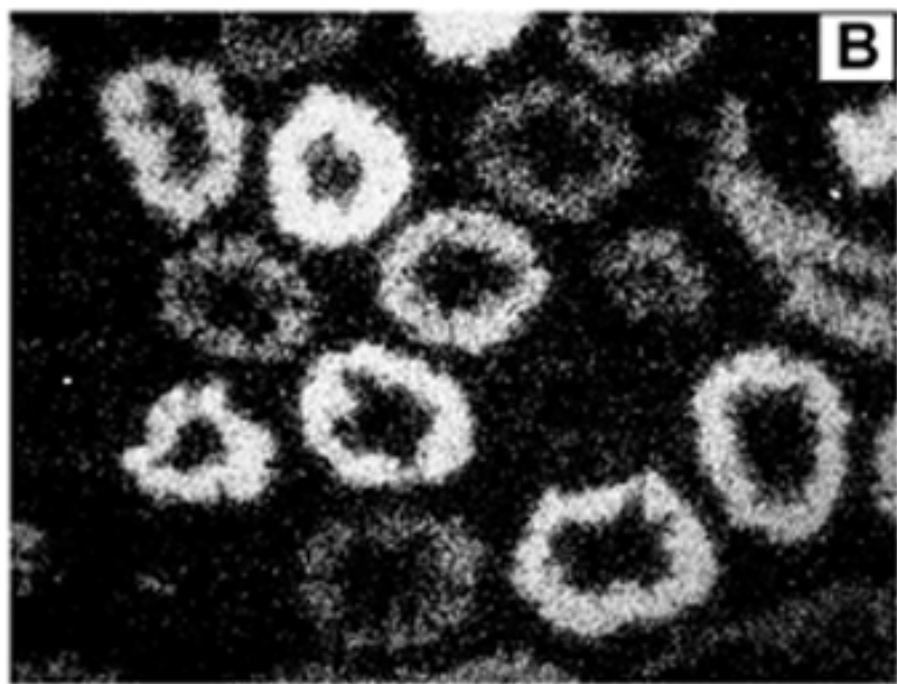

**B**

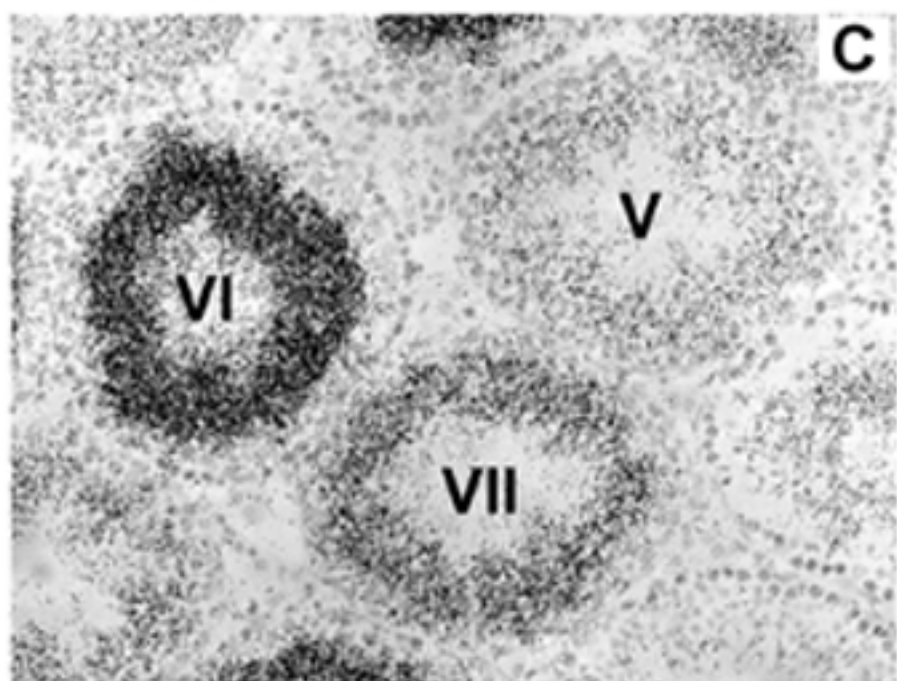

**C**

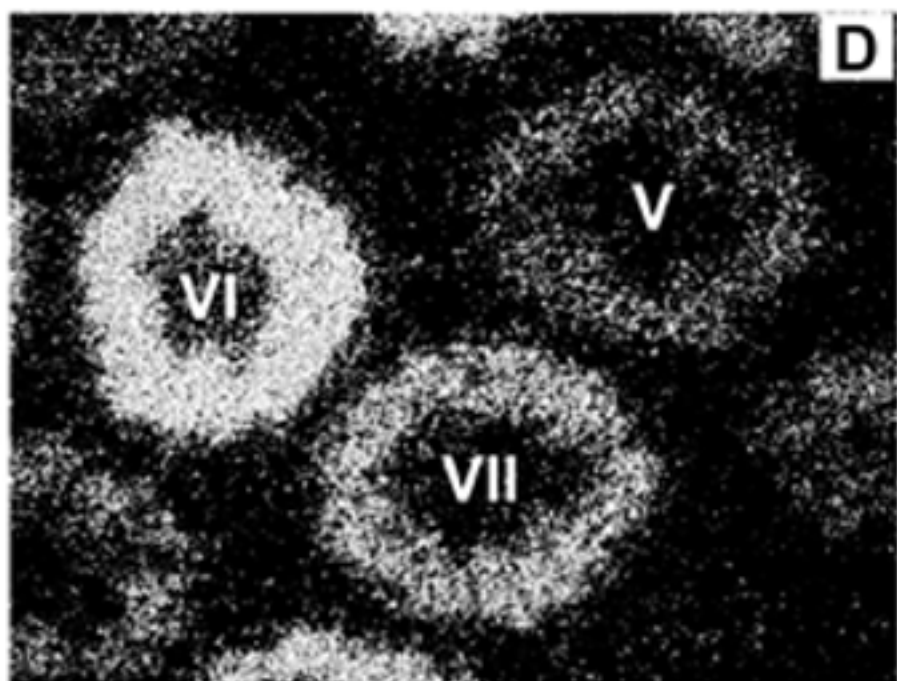

**D**

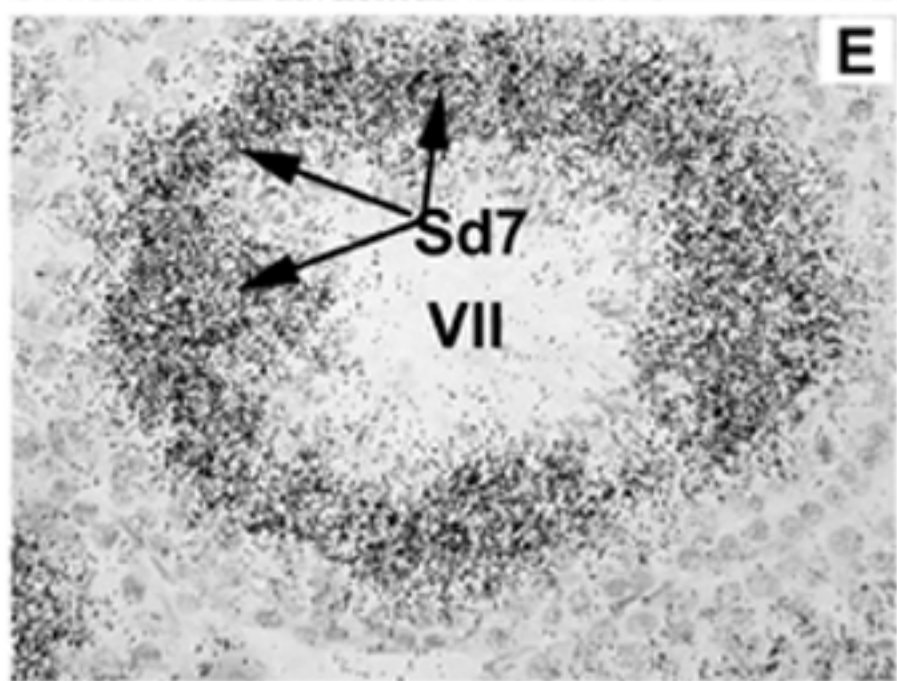

**E**

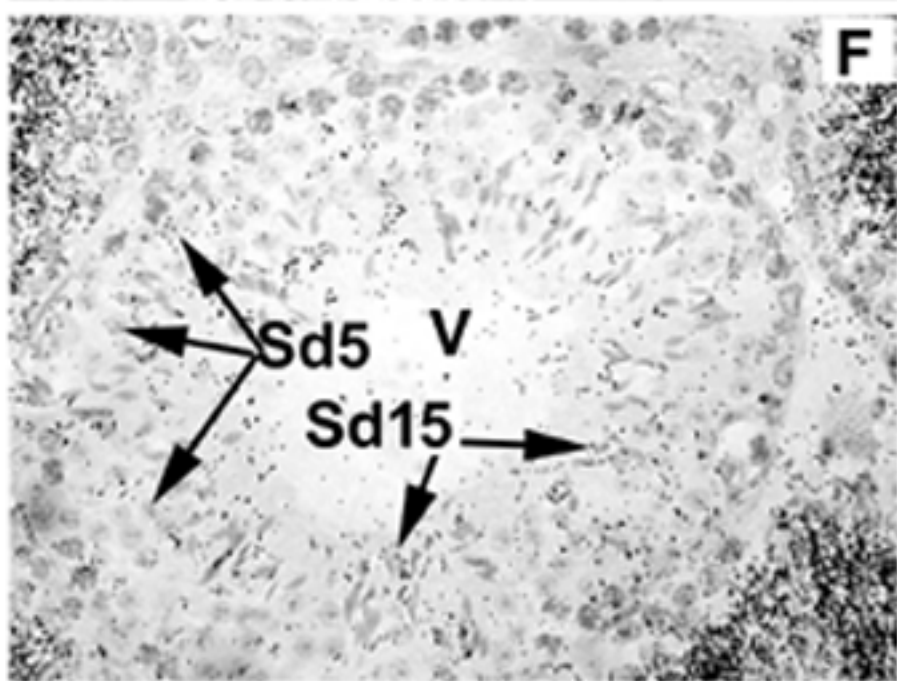

**F**

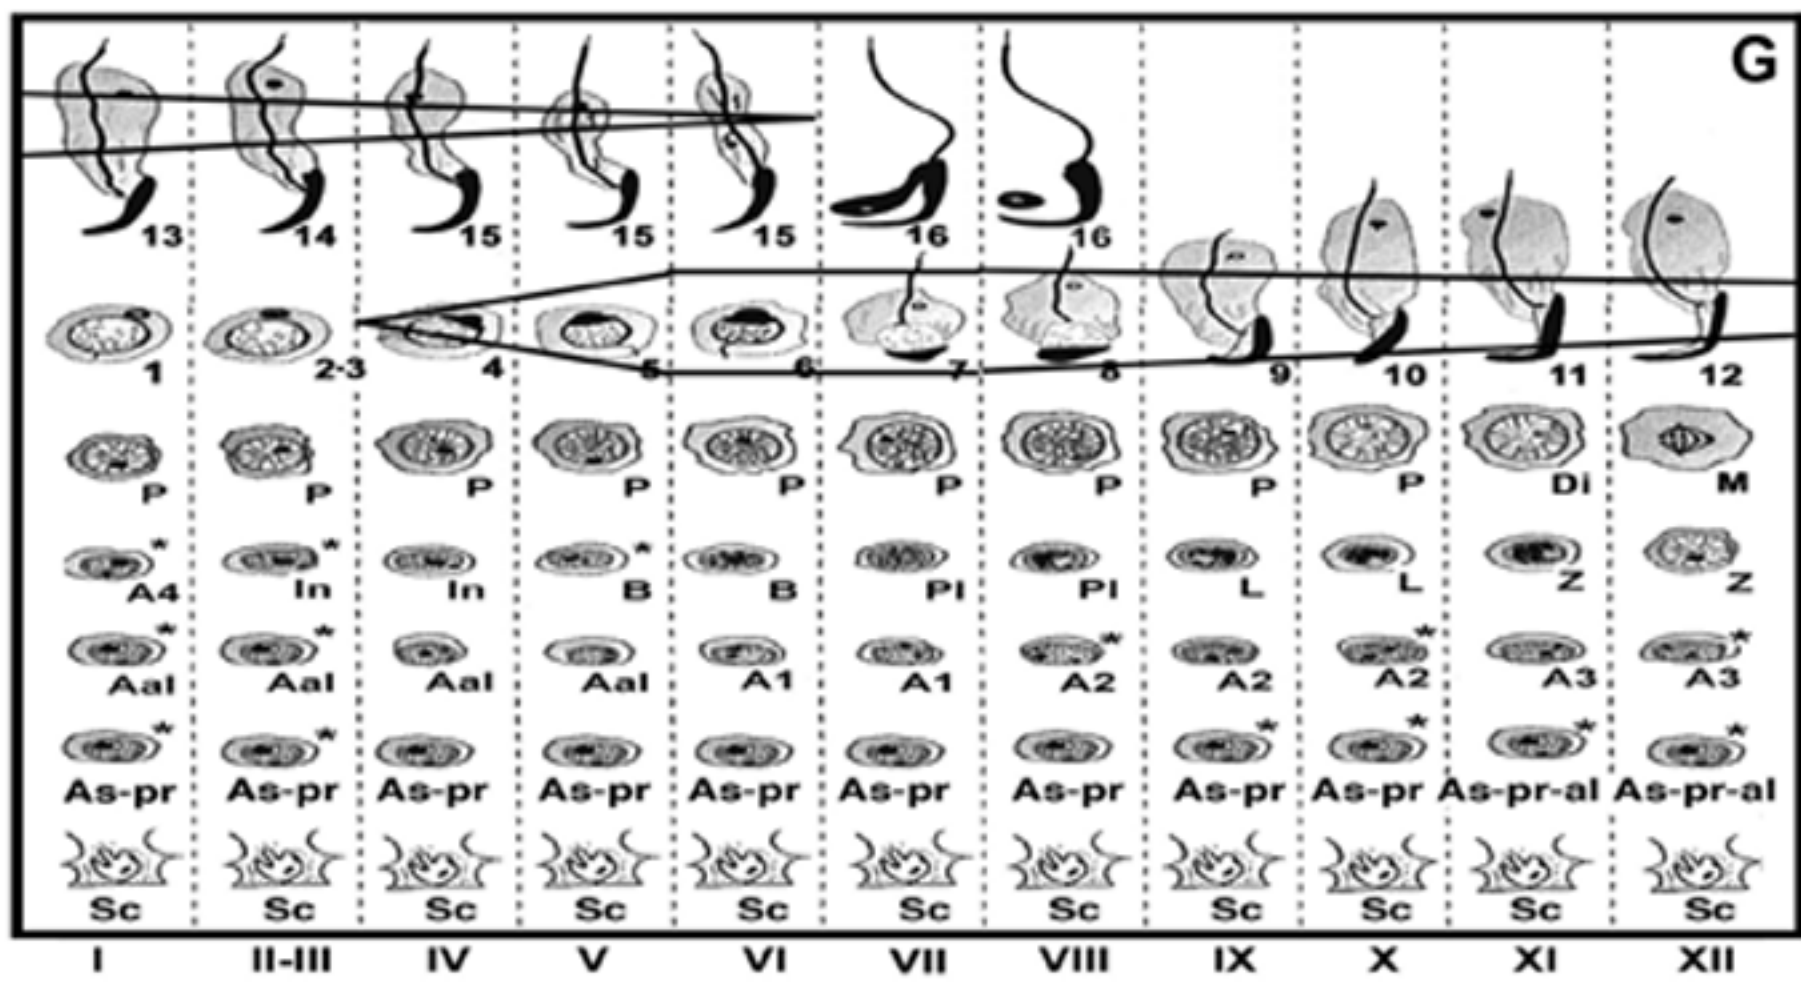

**G**

Supplement: pnas_1837812100_7.pdf [file pnas_1837812100_7.pdf]

TNP1

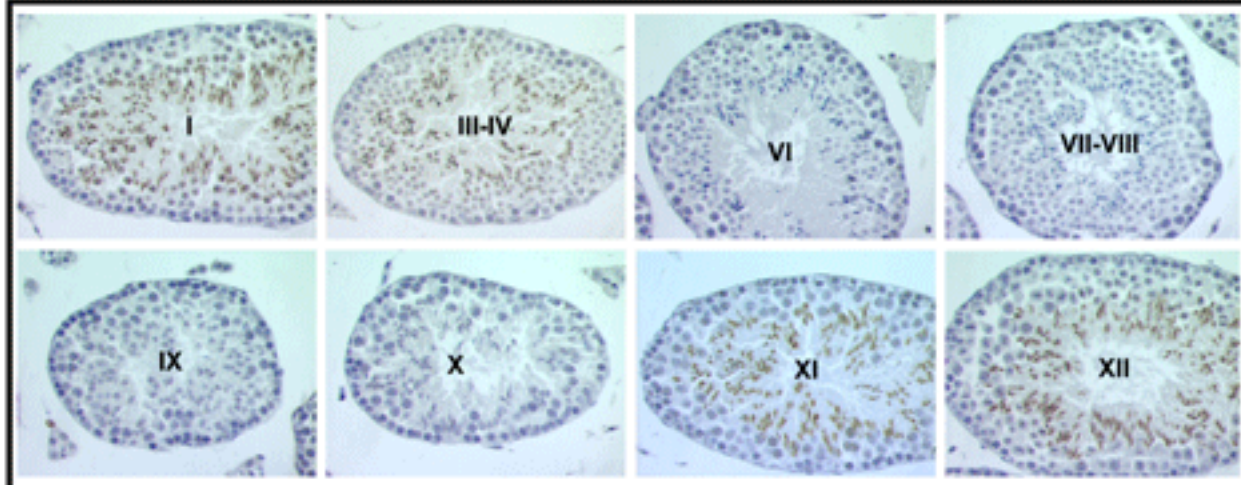

TNP2

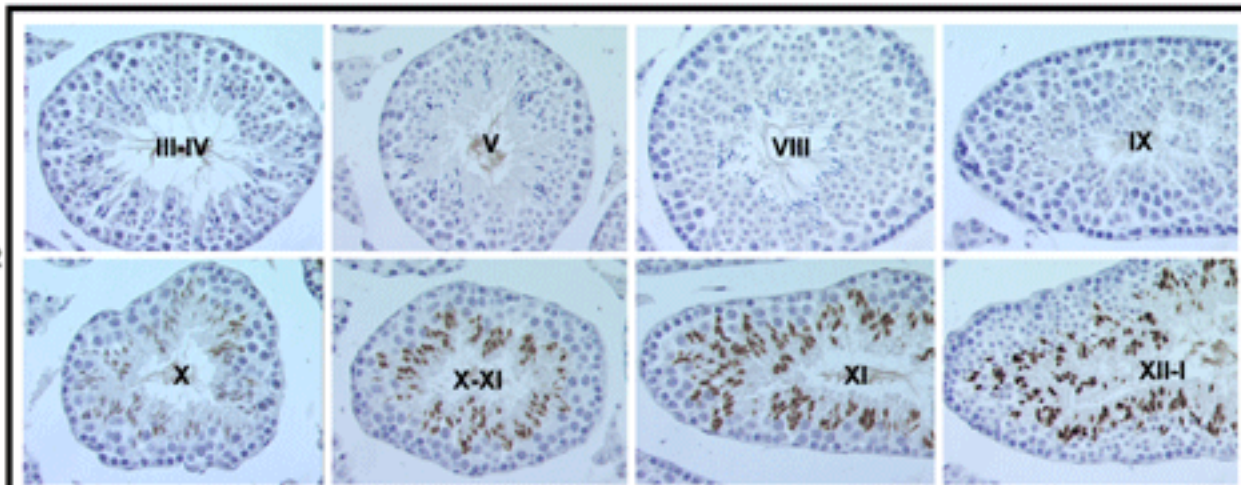

PRM1

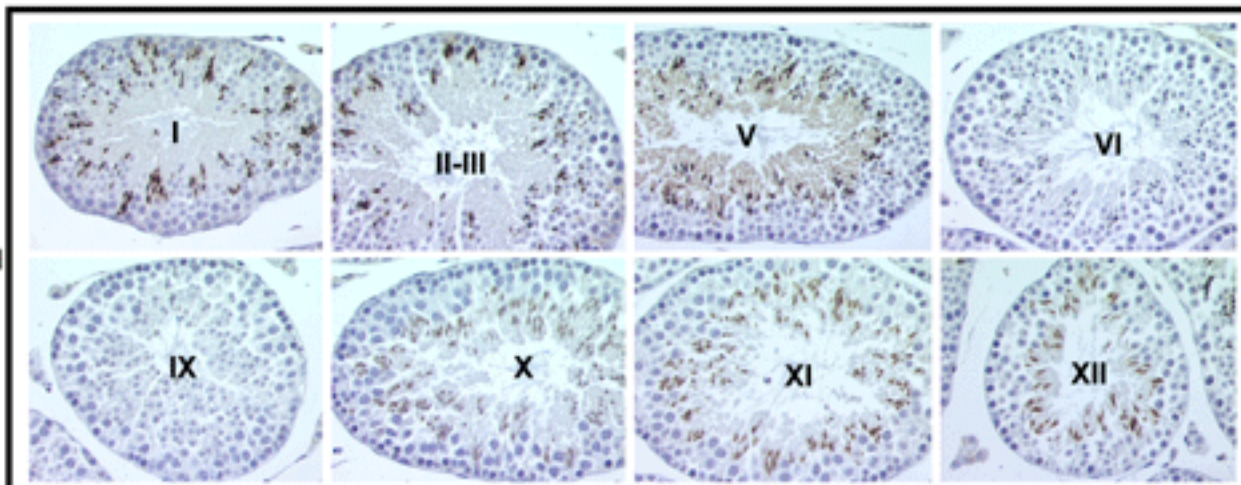

PRM2

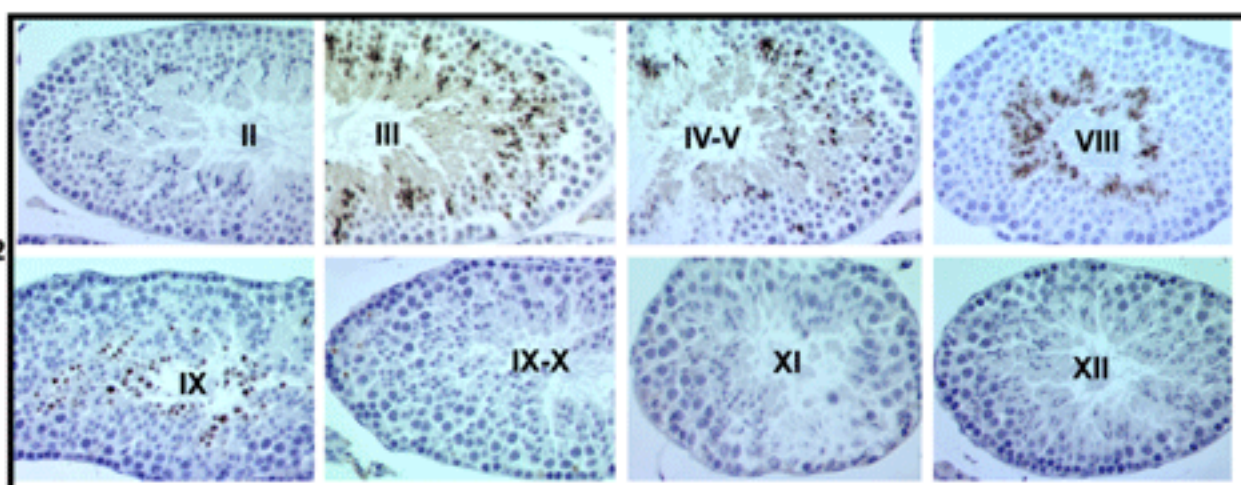

Supplement: pnas_1837812100_9.pdf [file pnas_1837812100_9.pdf]
